# Supplementary material
Source: PubMed Central journal article supplement (PMC2754763)

# Suppl. Fig. 1

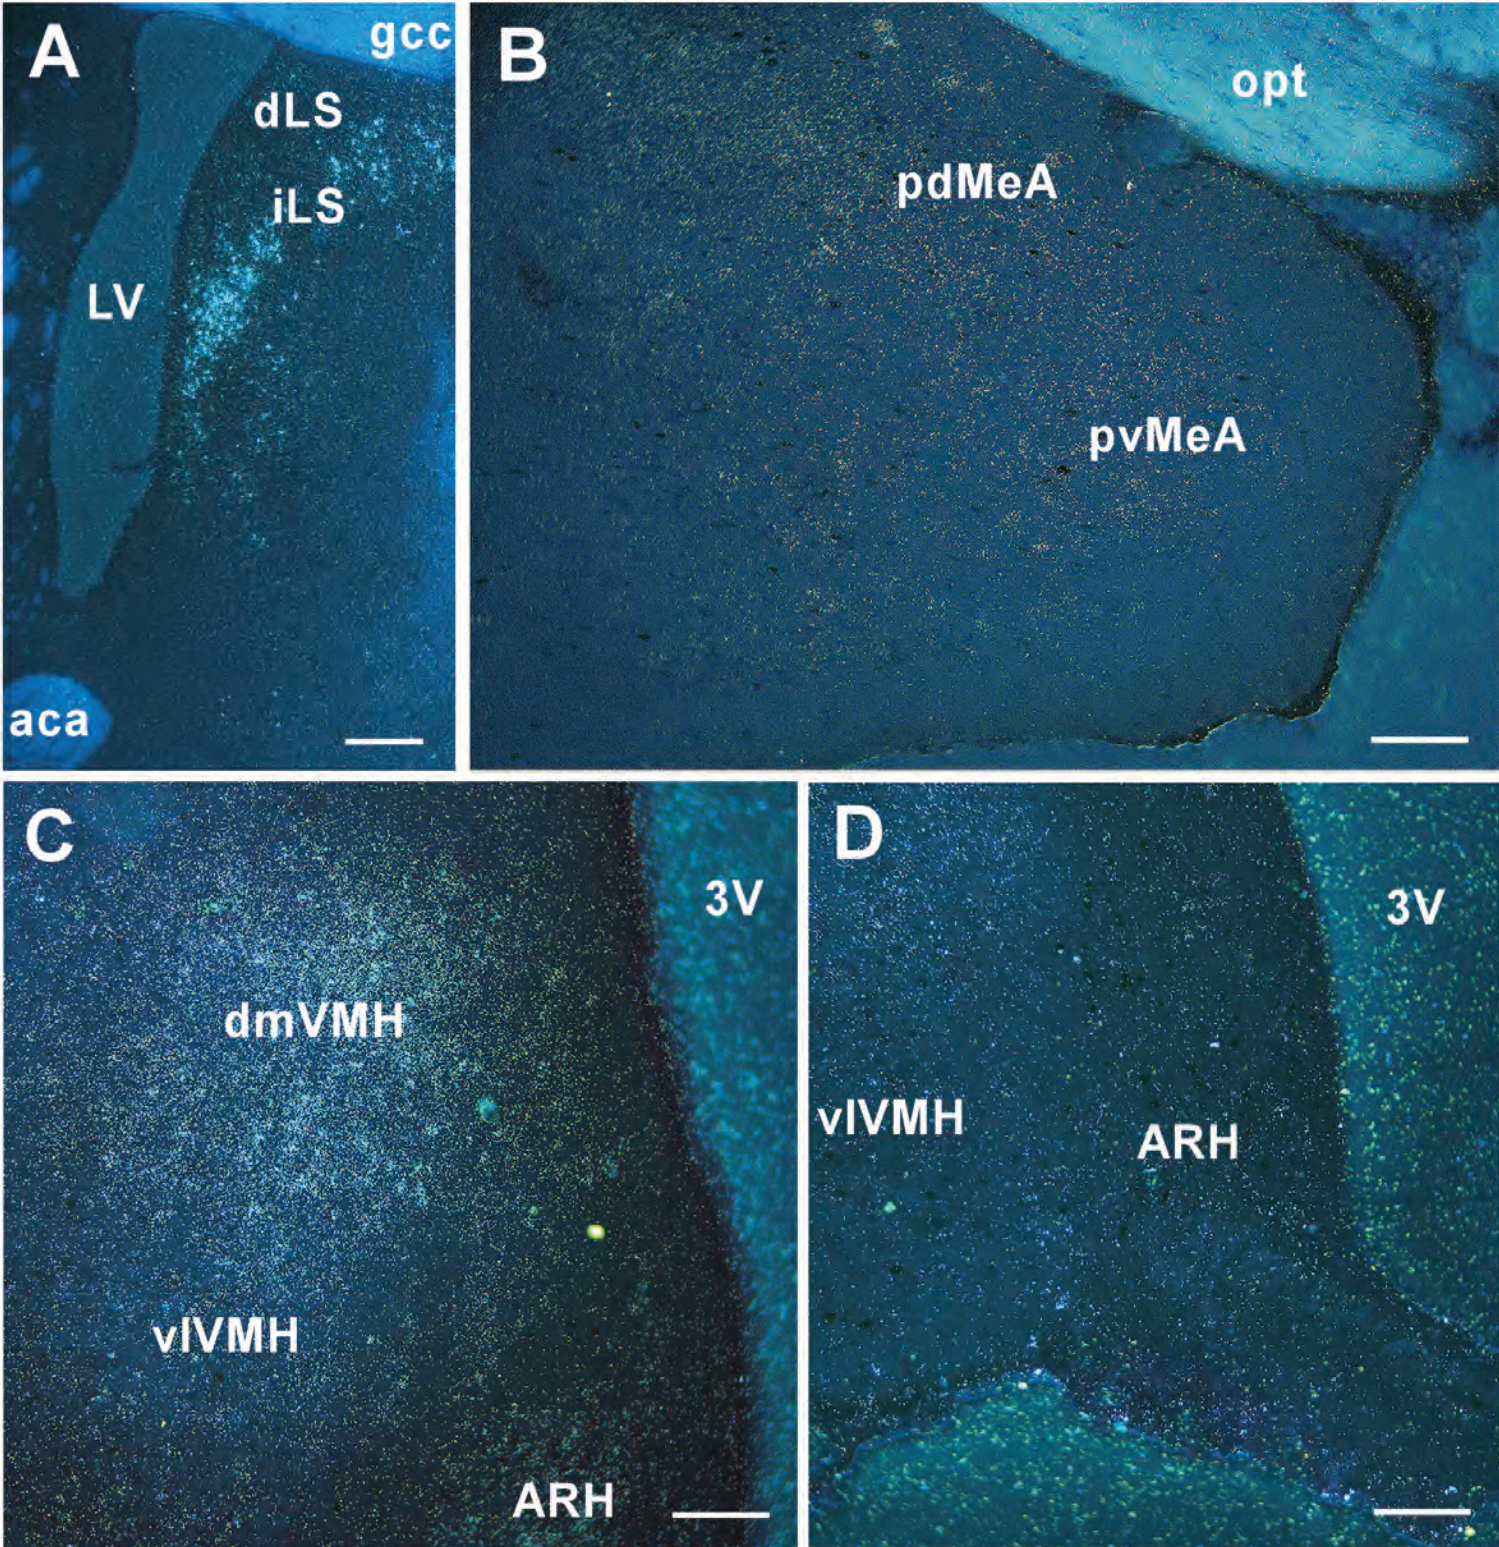

Supplement: NIHMS141175-supplement-Supp_Fig_1.pdf [file NIHMS141175-supplement-Supp_Fig_1.pdf]
